# Supplementary material
Source: PubMed Central journal article supplement (PMC5481493)
Supplement: NIHMS834478-supplement.pdf [file NIHMS834478-supplement.pdf]

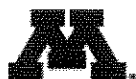

Stanley Finkelstein <stan@umn.edu>

---

**Telemedicine and e-Health - Manuscript ID TMJ-2015-0069.R1**

2 messages

---

**pmeravy@liebertpub.com** <pmeravy@liebertpub.com>

To: kballen@liebertpub.com

Cc: stan@umn.edu

Wed, Apr 27, 2016 at 10:18 AM

27-Apr-2016

TMJ-2015-0069.R1 - Strategies to maximize data collection response rates in an RCT focused on children with medical complexity

Dear Karen,

Dr. Finkelstein is in need of official permission to use Figure #1 from the above published manuscript in a paper he is submitting to another journal, not a Mary Ann Liebert publication.

Here are the publication details.

Volume 22 issue 4  
April 2016

DOI: 10.1089/tmj.2015.0069

Please, contact him at your earliest convenience. I have copied him on this email, so he is aware of our communication.

Thank you.

Patricia

Patricia A. Meravy  
Consulting Peer Review Specialist in Residence  
Mary Ann Liebert Publishers, Inc.  
140 Huguenot Street  
New Rochelle, NY 10801

---

**Ballen, Karen** <KBallen@liebertpub.com>

To: "stan@umn.edu" <stan@umn.edu>

Wed, Apr 27, 2016 at 10:20 AM

Dear Dr. Finkelstein:

Copyright permission is granted for use of Figure 1 from your article in TELEMEDICINE & e-HEALTH in another article.

Kind regards,

Karen Ballen  
Manager, Reprints, Permissions, and Open Access  
[Quoted text hidden]
